# Supplementary material for: Patching gaps in plant genomes results in gene movement and erosion of colinearity
Source: HighWire-hosted journal article supplement (doi:10.1101/gr.107284.110), 2010-06-07
Supplement: Binder2.pdf [file Binder2.pdf]

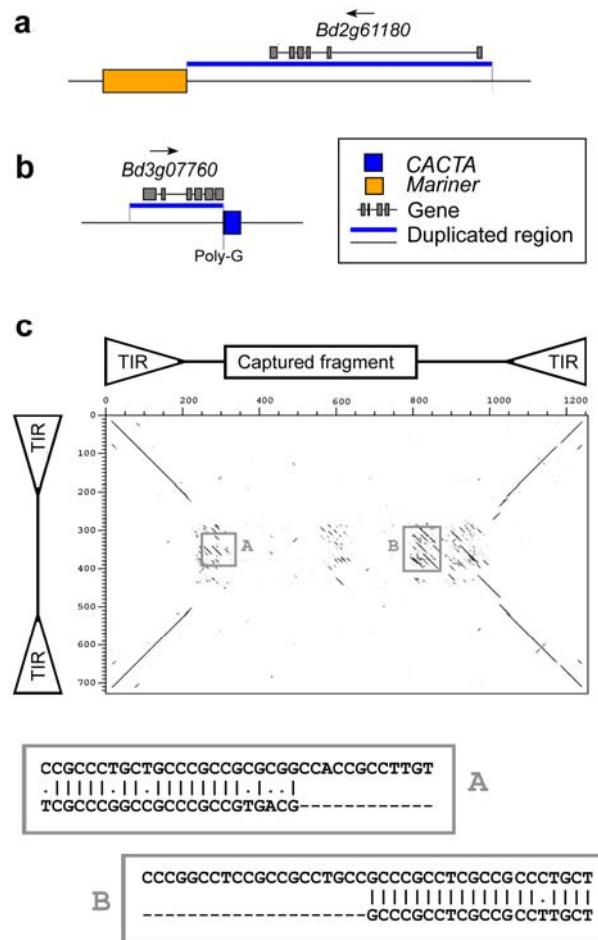

**Supplementary Figure 1.** Duplicated fragments are often flanked on one side by a TE fragment. Often the borders between duplicated fragment and acceptor sites contain G/C-rich motifs. These can form strong secondary structures such as DNA-quadruplexes which can induce DSBs. **a.** and **b.** show examples where fragments of TEs are adjacent to the duplicated fragment. **b.** A poly-G motif forms the border between the fragment containing *Bradi3g07760* and a *CACTA* transposon. **c.** Gene fragments captured by TEs are often bordering G/C-rich motifs. The DotPlot alignment shows a comparison of two *Mutator* element copies one with, and one without a captured fragment. All members of the analysed *Mutator* families have a very GC-rich internal domain with many low-complexity motifs at the border of the captured fragment. Additionally, almost all captured fragments terminate on one or both ends in G/C rich motifs.

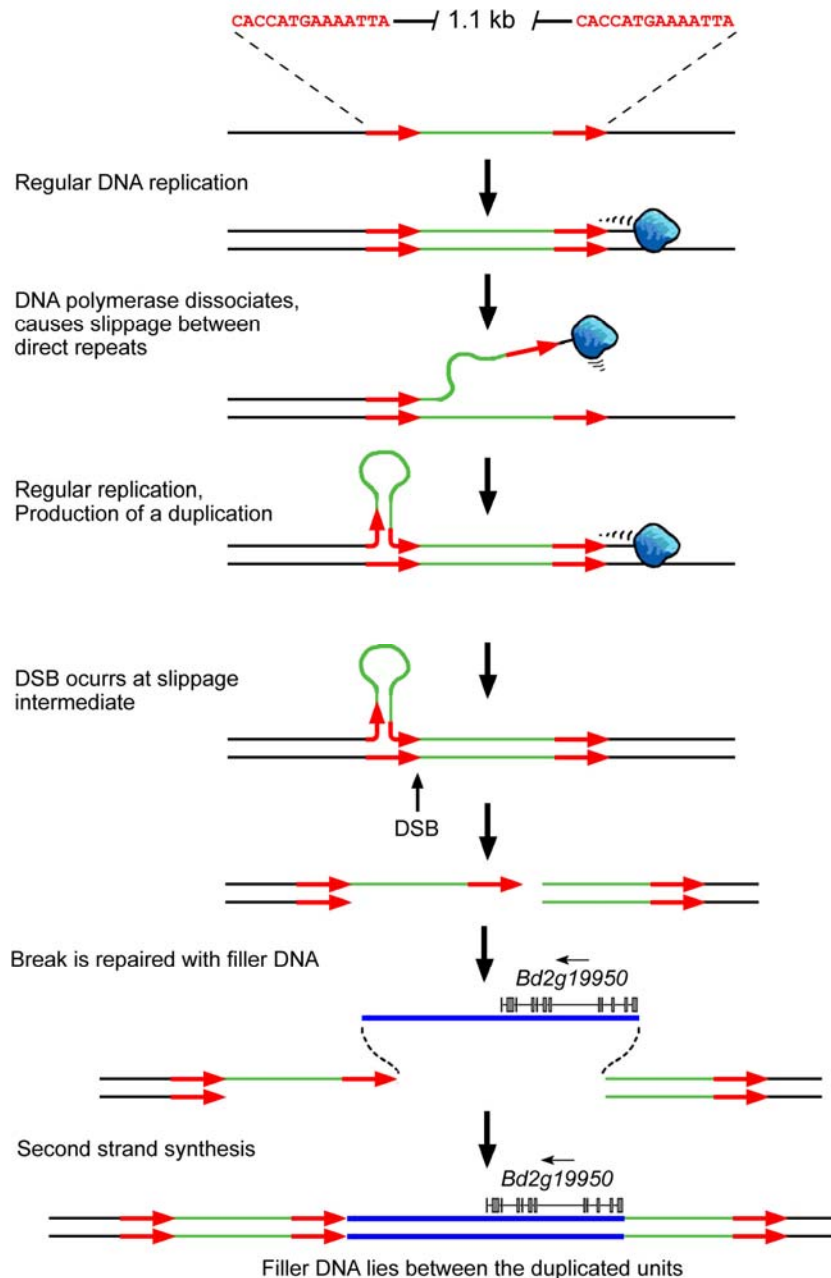

**Supplementary Figure 2.** Gene movement following a DSB caused by a replication slippage event. We propose that the DSB was introduced at the border of the slippage intermediate, leading to the duplicated fragment containing gene *Bradi2g19950* lying precisely at one end of the direct repeat.

**Supplementary Table 1.** Ancestor chromosome index. The fused chromosomes of *Brachypodium* and sorghum are assigned index numbers (ancestor chromosome index) describing which chromosomal segments correspond to the hypothetical ancestor chromosomes as proposed by Salse et al. (2009). The ancestral chromosomal organisation is still preserved in rice. Bd: *Brachypodium distachyon*, Sb: *Sorghum bicolor*.

| Chromosome | Chromosomal region <sup>a</sup> | Ancestral chromosome index |
|------------|---------------------------------|----------------------------|
| Bd1        | Bradi1g16450 - Bradi1g29120     | 7                          |
| Bd1        | Bradi1g29130 - Bradi1g52490     | 6                          |
| Bd1        | Bradi1g52500 - Bradi1g59820     | 7                          |
| Bd2        | Bradi2g14080 - Bradi2g40140     | 12                         |
| Bd3        | Bradi3g12460 - Bradi3g20720     | 8                          |
| Bd3        | Bradi3g20730 - Bradi3g34600     | 10                         |
| Bd3        | Bradi3g34610 - Bradi3g43080     | 8                          |
| Bd4        | Bradi4g08170 - Bradi4g08960     | 9                          |
| Bd4        | Bradi4g08970 - Bradi4g26920     | 11                         |
| Bd4        | Bradi4g26920 - Bradi4g39010     | 9                          |
| Sb1        | Sb01g16880 - Sb01g31280         | 11                         |
| Sb2        | Sb02g11385 - Sb02g32810         | 12                         |

<sup>a</sup>Defined by gene identifier numbers
